# Supplementary material for: Steric Effect of Antioxidant Diels-Alder-Type Adducts: A Comparison of Sanggenon C with Sanggenon D
Source: MDPI journal article supplement (doi:10.3390/molecules23102610), 2018-10-11

产品分析证书  
Certificate of Analysis

中文名称: 桑根酮C

English Name: Sanggenon C

别名 (Alias):

产品编码 (Cat. No.): BP1251

CAS Number: 80651-76-9

分子式 (M. F.): C<sub>40</sub>H<sub>36</sub>O<sub>12</sub>

分子量 (M. W.): 708.716

批号 (Batch No.): PRF8041321

报告日期 (Report date): 2017-04-13

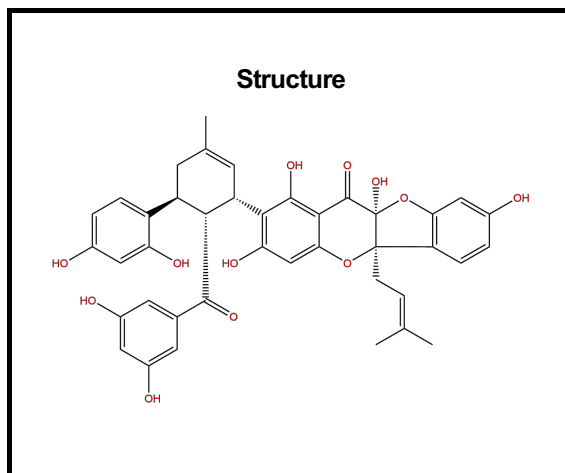

检验结果 (Analytical result):

| 检验项目 (Test Item)             | 检验指标 (Specifications)     | 检验结果 (Results) |
|------------------------------|---------------------------|----------------|
| 外观 Appearance                | Tan powder                | Tan powder     |
| 干燥失重 Loss on drying          | <3.0%                     | 1.18%          |
| 纯度 Purity (HPLC-DAD, 286nm)* | ≥98.0%                    | 98.28%         |
| 质谱 Mass                      | 708.7±1                   | Conforms       |
| 核磁 NMR                       | Comply with the structure | Conforms       |

\* 色谱图见附件 (Please find HPLC chromatography attached.)

检测方法 (Test Method): Column: Thermo HyPURITY C18, 4.6\*150mm, 3.0um; Column temperature: 30°C; Detection Mode: UV286nm;

Flow Rate: 1.0ml/min; Sample dissolution: Methanol; Mobile Phase: A, 0.1% Phosphoric acid in water B, Acetonitrile; Gradient elution: B, 35%-50%, 15min.

贮存条件 (Storage): 2~8°C, protected from light, keep package airtight when not in use.

复测期 (Retest date): two years (2019-04-12) under conditions list above.

QC: Zhang Ling

Date: 2017-04-13

QA: Wu Qi

Date: 2017-04-13

备注 (Remarks): The sample solutions should be prepared and used on the same day. It is the best preparing the solutions immediately before use. If the solutions have to be made up in advance, it should be made as aliquots in tightly sealed vials at less than -20°C. Generally, these might be useable for up to two weeks.

In case of quality issue, please contact us within 15 days after receipt of the product.

Tel: +86-28-82633397 Fax: +86-28-82633165

http://www.phytopurify.com Email: sales@biopurify.com biopurify@gmail.com

## SAMPLE INFORMATION

|                   |                        |                     |              |
|-------------------|------------------------|---------------------|--------------|
| Sample Name:      | Sanggenon C            | Acquired By:        | System       |
| Sample Type:      | Unknown                | Sample Set Name:    |              |
| Vial:             | 79                     | Acq. Method Set:    | Sanggenon C  |
| Injection #:      | 1                      | Processing Method:  | Samples      |
| Injection Volume: | 5.00 ul                | Channel Name:       | 286.0nm      |
| Run Time:         | 25.0 Minutes           | Proc. Chnl. Descr.: | PDA 286.0 nm |
|                   |                        |                     |              |
| Date Acquired:    | 2017-4-13 13:36:57 CST |                     |              |
| Date Processed:   | 2017-4-13 14:21:03 CST |                     |              |

### Auto-Scaled Chromatogram

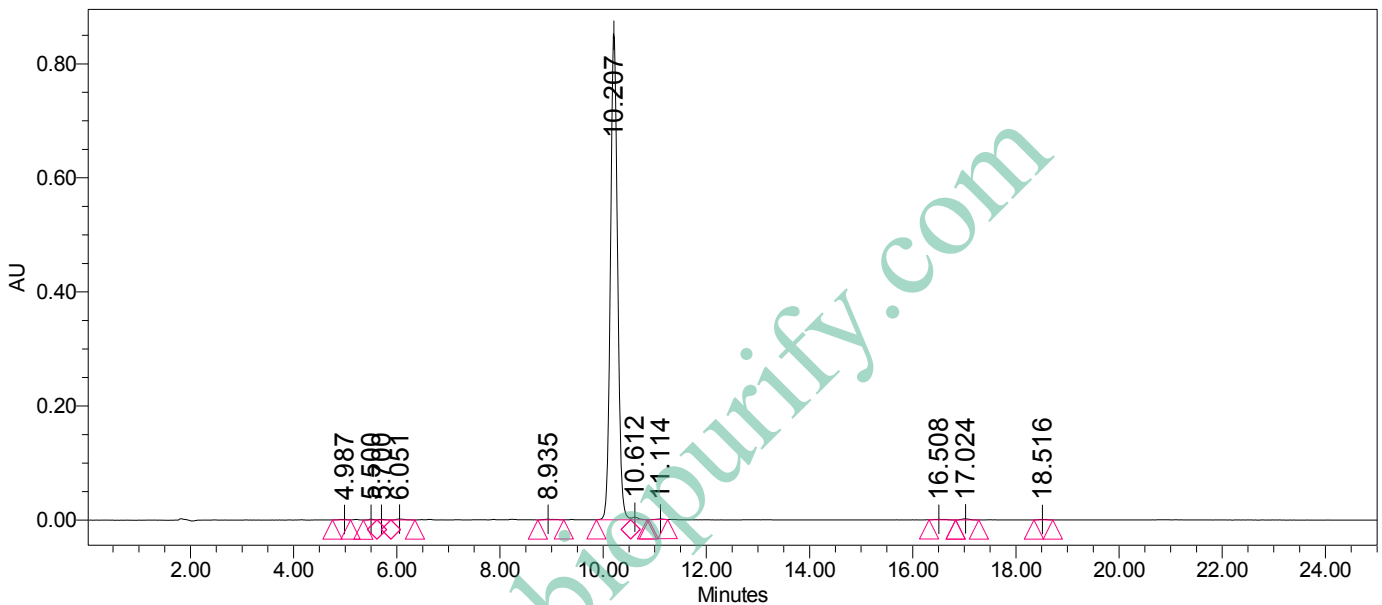

### Peak Results

|    | Name | RT     | Area    | % Area | USP Plate Count | USP Resolution |
|----|------|--------|---------|--------|-----------------|----------------|
| 1  |      | 4.987  | 9160    | 0.11   | 4367.3          |                |
| 2  |      | 5.500  | 9127    | 0.11   | 14729.7         | 1.2            |
| 3  |      | 5.700  | 8033    | 0.10   | 6709.6          | 0.8            |
| 4  |      | 6.051  | 15873   | 0.19   | 9614.8          | 1.3            |
| 5  |      | 8.935  | 12993   | 0.16   | 10000.3         | 9.3            |
| 6  |      | 10.207 | 8184191 | 98.28  | 26217.7         | 4.4            |
| 7  |      | 10.612 | 36977   | 0.44   |                 | 1.6            |
| 8  |      | 11.114 | 9788    | 0.12   | 25689.7         | 2.1            |
| 9  |      | 16.508 | 12318   | 0.15   | 4938.7          | 15.7           |
| 10 |      | 17.024 | 20343   | 0.24   | 81329.3         | 1.4            |
| 11 |      | 18.516 | 8353    | 0.10   | 76093.1         | 4.6            |

NMR:

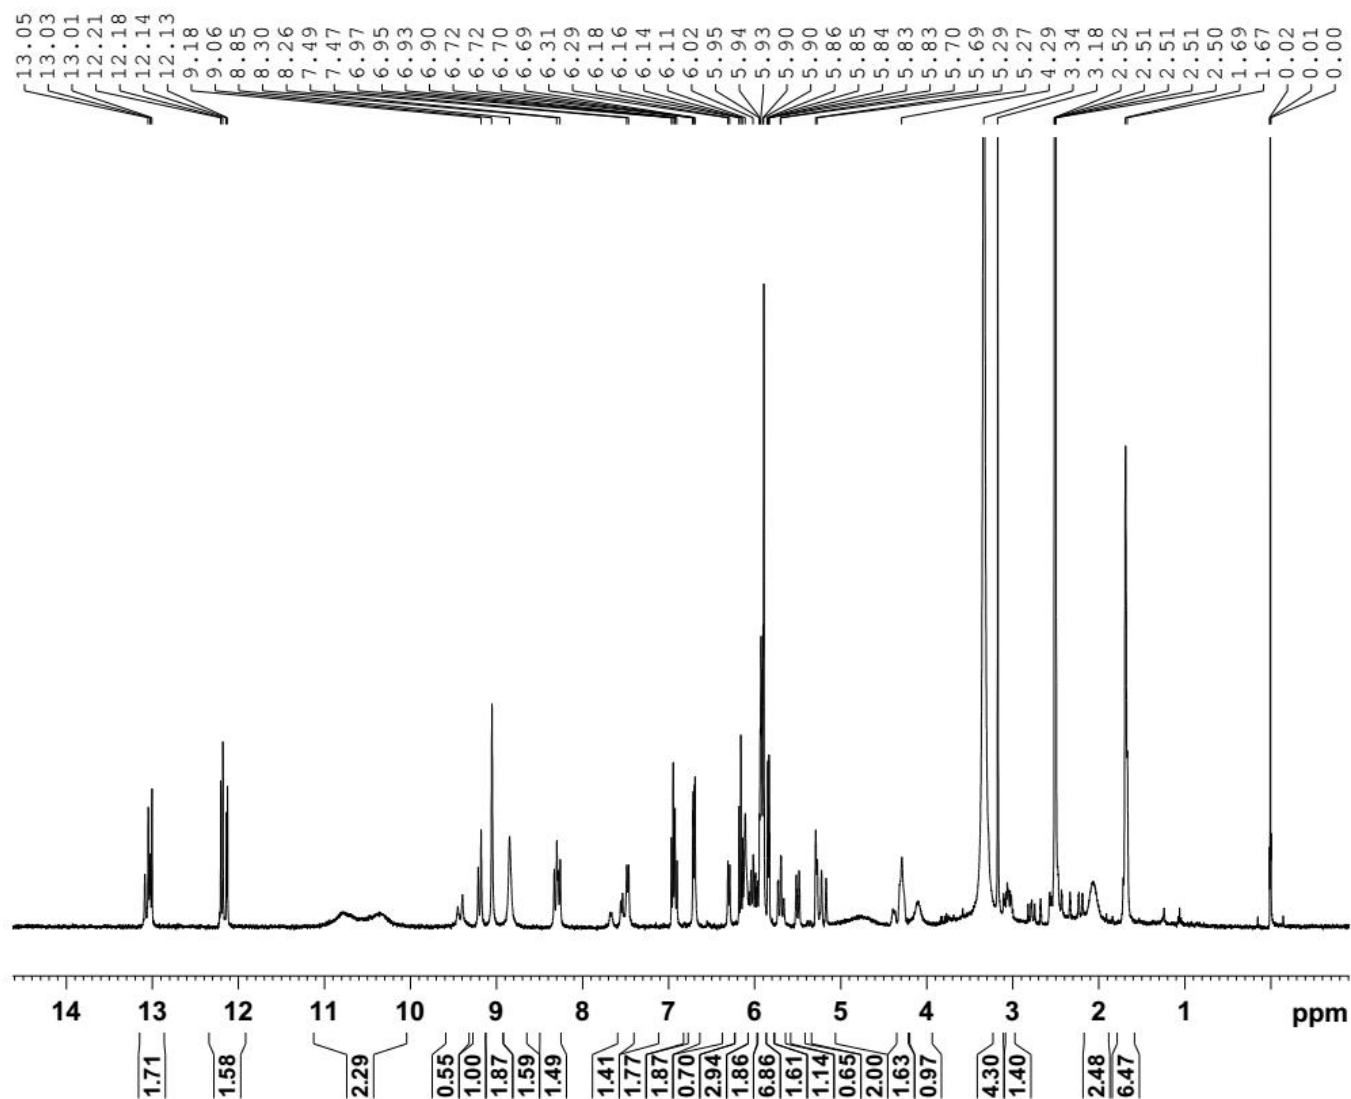

Supplement: s1 [file s1]
