# Supplementary material for: Steric Effect of Antioxidant Diels-Alder-Type Adducts: A Comparison of Sanggenon C with Sanggenon D
Source: MDPI journal article supplement (doi:10.3390/molecules23102610), 2018-10-11
Supplement: s1 [file s1]

## Supplemental Material-1

# Sanggenons C and D as Antioxidant Diels-Alder-Type Adducts Protecting Mesenchymal Stem Cells from Oxidative Stress: Evidence of the Steric Effect

Xican Li <sup>1, 2, \*, †</sup>, Zhenxing Ren <sup>3, 4, †</sup>, Zimei Wu <sup>3, 4</sup>, Zhen Fu <sup>3, 4</sup>, Hong Xie <sup>1</sup>, Langyu Deng <sup>1</sup>, Xiaohua Jiang <sup>5</sup>, Dongfeng Chen <sup>3, 4, \*</sup>

<sup>1</sup> School of Chinese Herbal Medicine, Guangzhou University of Chinese Medicine, Guangzhou 510006, China; [lixc@gzucm.edu.cn](mailto:lixc@gzucm.edu.cn) (X.L.); [xiehongxh1@163.com](mailto:xiehongxh1@163.com) (H.X.); [dly9001@qq.com](mailto:dly9001@qq.com) (L.D.)

<sup>2</sup> Innovative Research & Development Laboratory of TCM, Guangzhou 510006, China;

<sup>3</sup> School of Basic Medical Science, Guangzhou University of Chinese Medicine, Guangzhou 510006, China; [251351061@qq.com](mailto:251351061@qq.com) (Z.R.); [1244642557@qq.com](mailto:1244642557@qq.com) (Z.W.); [fuzhen@gzucm.edu.cn](mailto:fuzhen@gzucm.edu.cn) (Z.F.); [chen888@gzucm.edu.cn](mailto:chen888@gzucm.edu.cn) (D.C.)

<sup>4</sup> The Research Center of Basic Integrative Medicine, Guangzhou University of Chinese Medicine, Guangzhou 510006, China.

<sup>5</sup> School of Biomedical Sciences, Faculty of Medicine, The Chinese University of Hong Kong, Sha Tin, Hong Kong 999077, China; [xjiang@cuhk.edu.hk](mailto:xjiang@cuhk.edu.hk) (X.J.)

\*Corresponding author. E-mail: [lixc@gzucm.edu.cn](mailto:lixc@gzucm.edu.cn) (X.L.); [chen888@gzucm.edu.cn](mailto:chen888@gzucm.edu.cn) (D.C.). Tel: +86-20-39358076

<sup>†</sup>Equal contributors

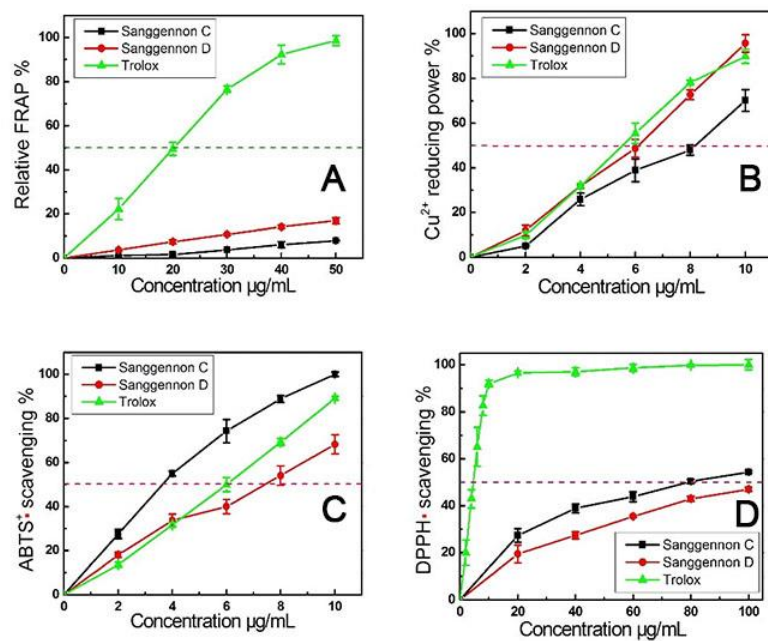

**Suppl. 1** The dose-response curves of sanggenon C & D in various antioxidant assays: (A) FRAP assay; (B) Cu-reducing power assay; (C)  $\text{ABTS}^{\bullet+}$  scavenging assay; (D)  $\text{DPPH}^{\bullet}$  scavenging assay. (Each value is expressed as mean $\pm$ SD, n=3)
