# Supplementary material for: Steric Effect of Antioxidant Diels-Alder-Type Adducts: A Comparison of Sanggenon C with Sanggenon D
Source: MDPI journal article supplement (doi:10.3390/molecules23102610), 2018-10-11
Supplement: s1 [file s1]

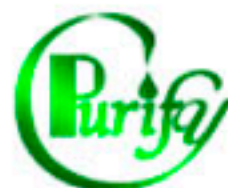

## 产品分析证书 Certificate of Analysis

中文名称: 桑根酮D

English Name: Sanggenone D

别名 (Alias):

产品编码 (Cat. No.): BP1252

CAS Number: 81422-93-7

分子式 (M. F.): C<sub>40</sub>H<sub>36</sub>O<sub>12</sub>

分子量 (M. W.): 708.716

批号 (Batch No.): PRF7110422

报告日期 (Report date): 2016/11/4

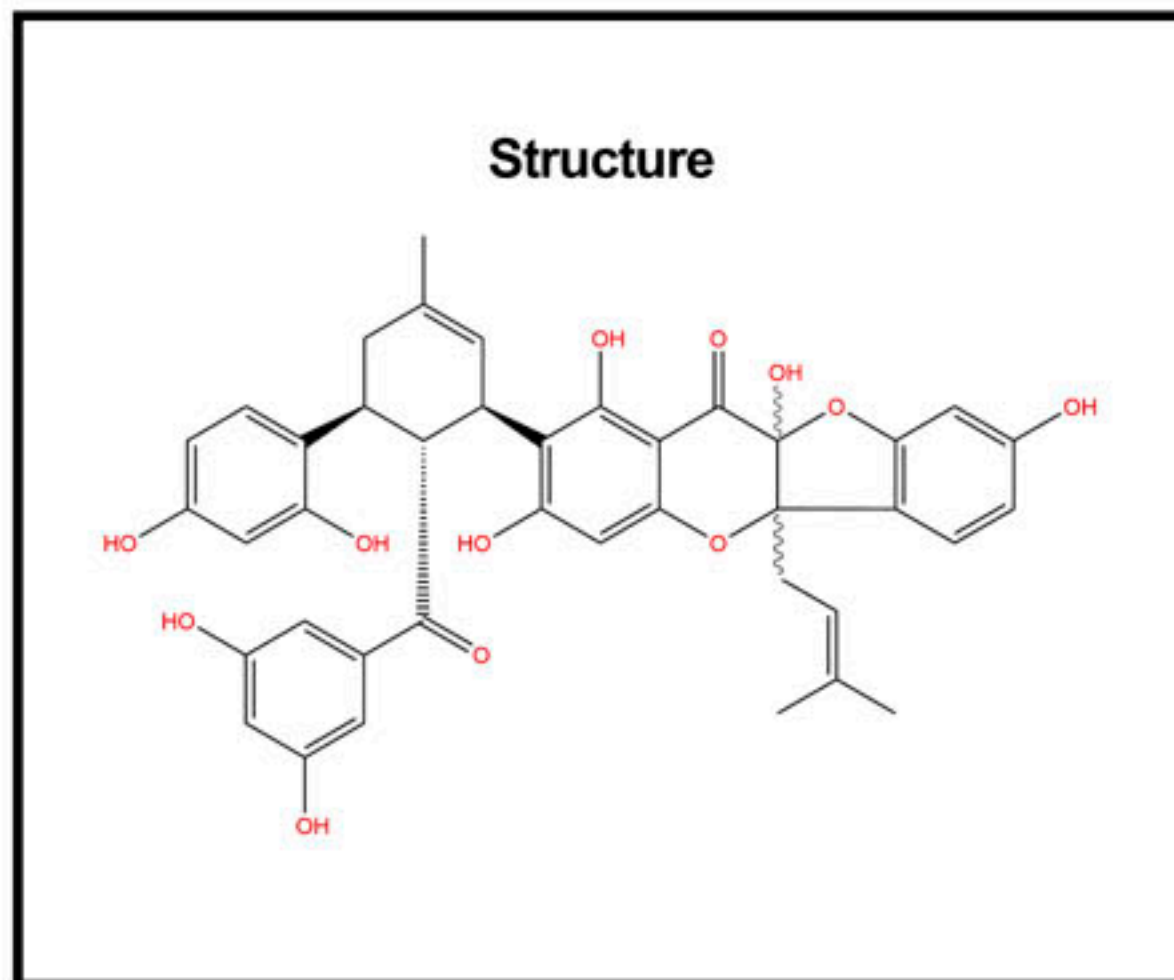

### 检验结果 (Analytical result):

| 检验项目 (Test Item)            | 检验指标 (Specifications)     | 检验结果 (Results)     |
|-----------------------------|---------------------------|--------------------|
| 外观Appearance                | Soil yellow powder        | Soil yellow powder |
| 干燥失重Loss on drying          | <3.0%                     | 1.28%              |
| 纯度Purity (HPLC-DAD, 286nm)* | ≥97.0%                    | 97.19%             |
| 质谱Mass                      | 708.716±1                 | Conforms           |
| 核磁NMR                       | Comply with the structure | Conforms           |

\* 色谱图见附件 (Please find HPLC chromatography attached.)

贮存条件 (Storage): 2~8℃

复测期 (Retest date): two years (2018-11-03) under conditions list above.

备注 (Remarks): 如遇质量问题, 请于收到产品之日起 15 日内与我们联系。

In case of quality issue, please contact us within 15 days after receipt of the product.

QC:

Zhang Ling

Date: 2016年11月4日

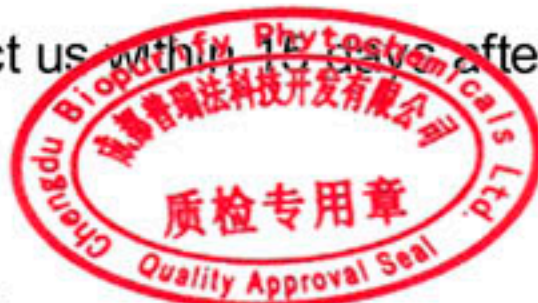

QA:

Wu Qi

Date: 2016年11月4日



# SAMPLE INFORMATION

Sample Name: Kuwanon D PRF7110422  
Sample Type: Unknown  
Vial: 70  
Injection #: 1  
Injection Volume: 10.00 ul  
Run Time: 25.0 Minutes

Acquired By: System  
Sample Set Name:  
Acq. Method Set: Kuwanon D  
Processing Method: Samples  
Channel Name: 286.0nm  
Proc. Chnl. Descr.: PDA 286.0 nm

Date Acquired: 2016-11-4 11:00:56 CST  
Date Processed: 2016-11-4 12:38:16 CST

## Auto-Scaled Chromatogram

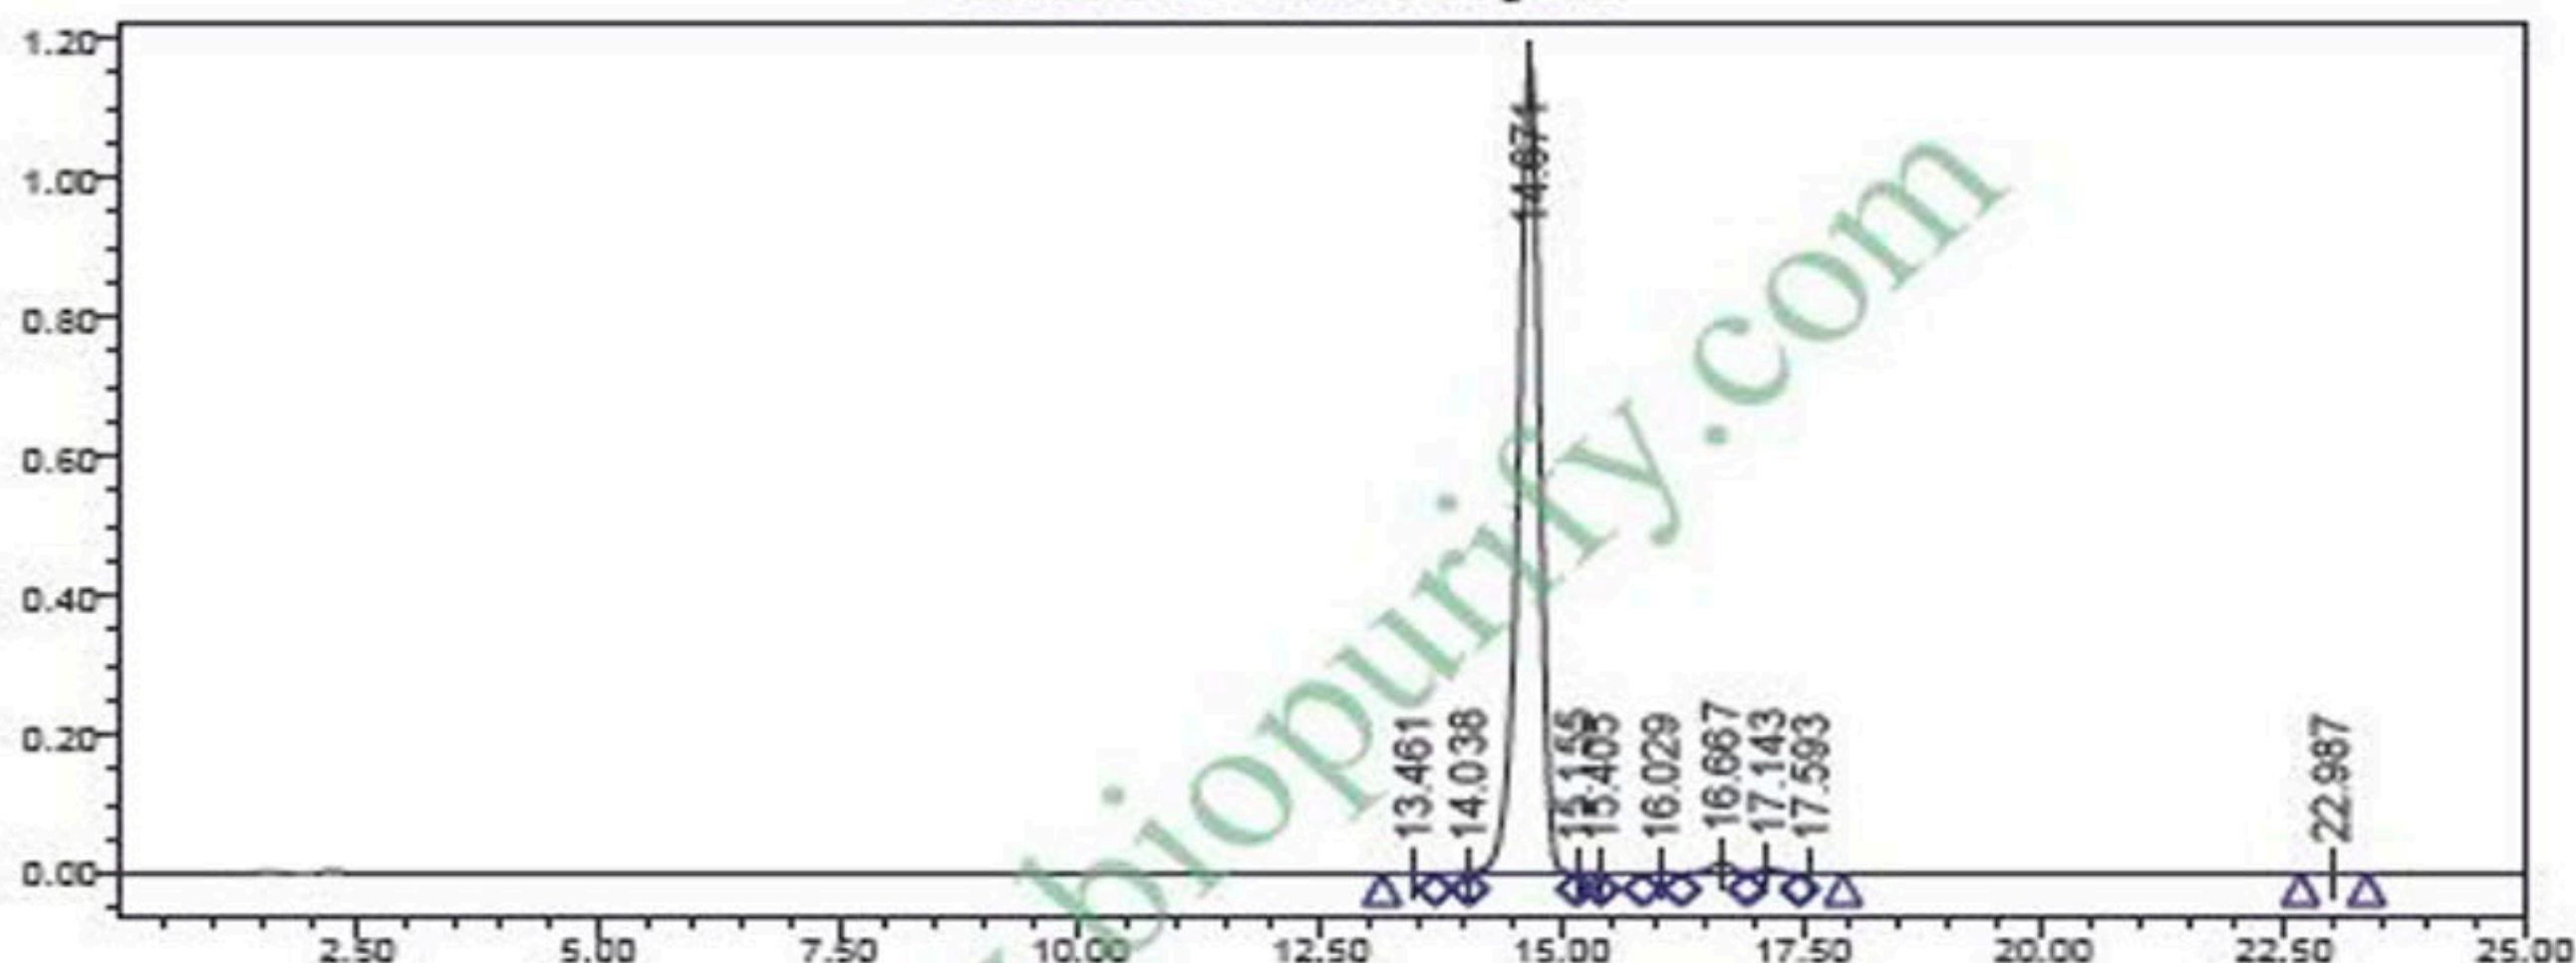

## Peak Results

|    | RT     | Area     | % Area | USP Plate Count | USP Resolution |
|----|--------|----------|--------|-----------------|----------------|
| 1  | 13.461 | 11555    | 0.06   | 24456.42        |                |
| 2  | 14.038 | 22422    | 0.12   |                 |                |
| 3  | 14.671 | 17828454 | 97.19  | 21881.34        |                |
| 4  | 15.155 | 25663    | 0.14   |                 |                |
| 5  | 15.405 | 27899    | 0.15   |                 |                |
| 6  | 16.029 | 26536    | 0.14   |                 |                |
| 7  | 16.667 | 264302   | 1.44   | 23818.92        |                |
| 8  | 17.143 | 113600   | 0.62   | 23682.18        | 1.06           |
| 9  | 17.593 | 12254    | 0.07   |                 |                |
| 10 | 22.987 | 11883    | 0.06   | 62181.31        |                |

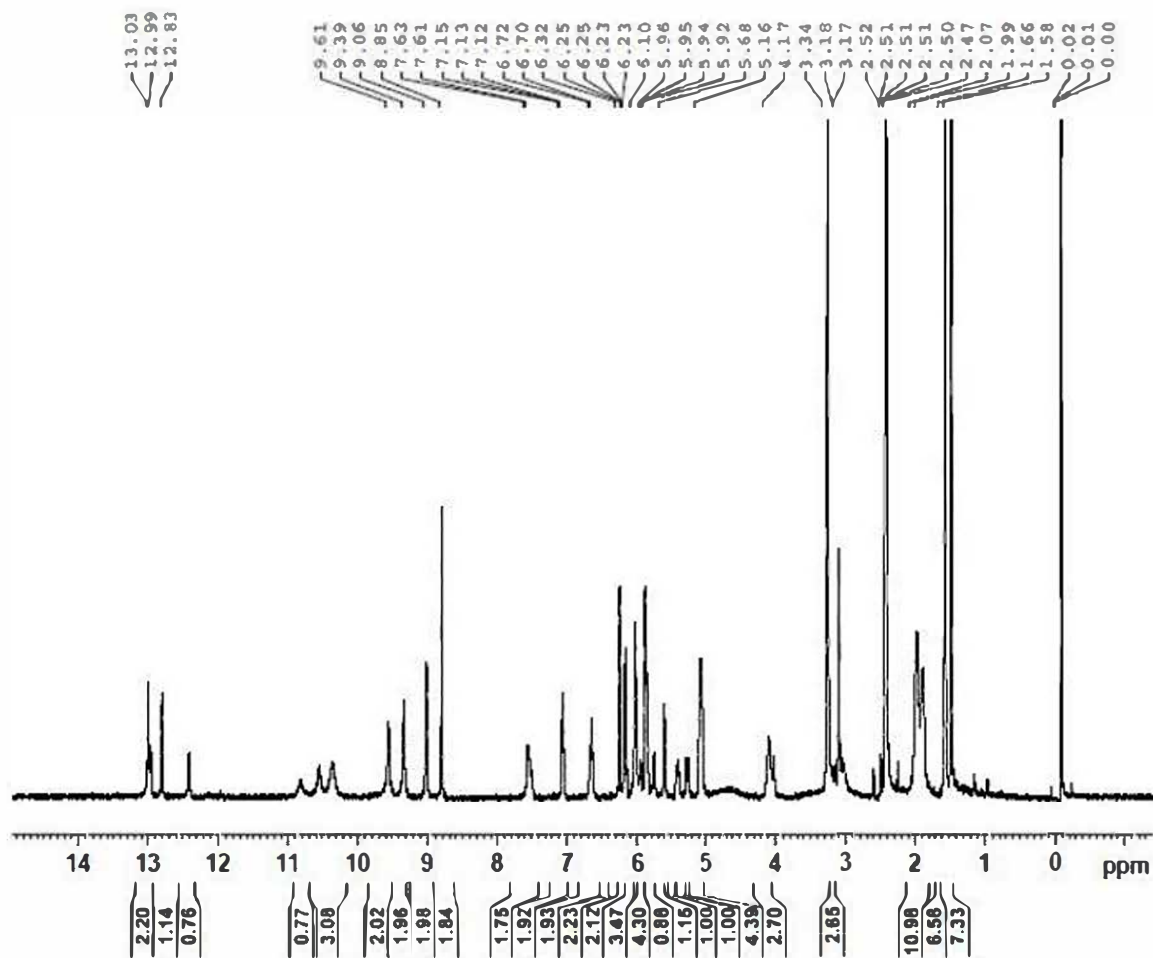

NAME: 20011  
EXPNO: 2  
PROCNO: 1

PROBHD: 5 mm PASSED US-  
PULPROG: zgpg  
TD: 65536  
SOLVENT: DMSO  
NS: 32  
DS: 0  
SWH: 8802.817  
FIDRES: 0.200009  
AQ: 2.4929316  
RG: 203  
IN: 66.800  
DE: 6.50  
TE: 297.9  
D1: 1.00000000  
ED0: 1

----- CHANNEL f1 -----  
NUC1: 1H  
P1: 12.49  
PL1: -3.50  
PL12: 17.92492264  
SFO1: 400.1124008  
SI: 32768  
SF: 400.1100000  
KRM: RM  
LSB: 0  
GB: 0.30  
CB: 0  
PC: 1.00
